# Supplementary material for: How well do stratospheric reanalyses reproduce high-resolution satellite temperature measurements?
Source: Copernicus journal article supplement (doi:10.5194/acp-18-13703-2018), 2018-09-27
Supplement: Supplementary file 1 [file acp-18-13703-2018-supplement.zip]

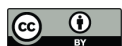

## *Supplement of*

# **How well do stratospheric reanalyses reproduce high-resolution satellite temperature measurements?**

**Corwin J. Wright and Neil P. Hindley**

*Correspondence to:* Corwin J. Wright ([c.wright@bath.ac.uk](mailto:c.wright@bath.ac.uk))

- [acp-18-13703-2018-supplement-title-page.pdf](#)
- [S01.png](#)
- [S02.png](#)
- [S03.png](#)
- [S04.png](#)
- [S05.png](#)
- [S06.png](#)
- [S07.png](#)
- [S08.png](#)
- [S09.png](#)
- [S10.png](#)
- [S11.png](#)
- [S12.png](#)

The copyright of individual parts of the supplement might differ from the CC BY 4.0 License.
